# Supplementary material for: A Balance between Pro‐Inflammatory and Pro‐Reparative Macrophages is Observed in Regenerative D‐MAPS
Source: PubMed Central journal article supplement (PMC10104668; doi:10.1002/advs.202204882), 2023-02-10
Supplement: ADVS-10-2204882-s001.pdf [file ADVS-10-2204882-s001.pdf]

## Supplementary Material for

# A balance between pro-inflammatory and pro-reparative macrophages is observed in regenerative D-MAPS

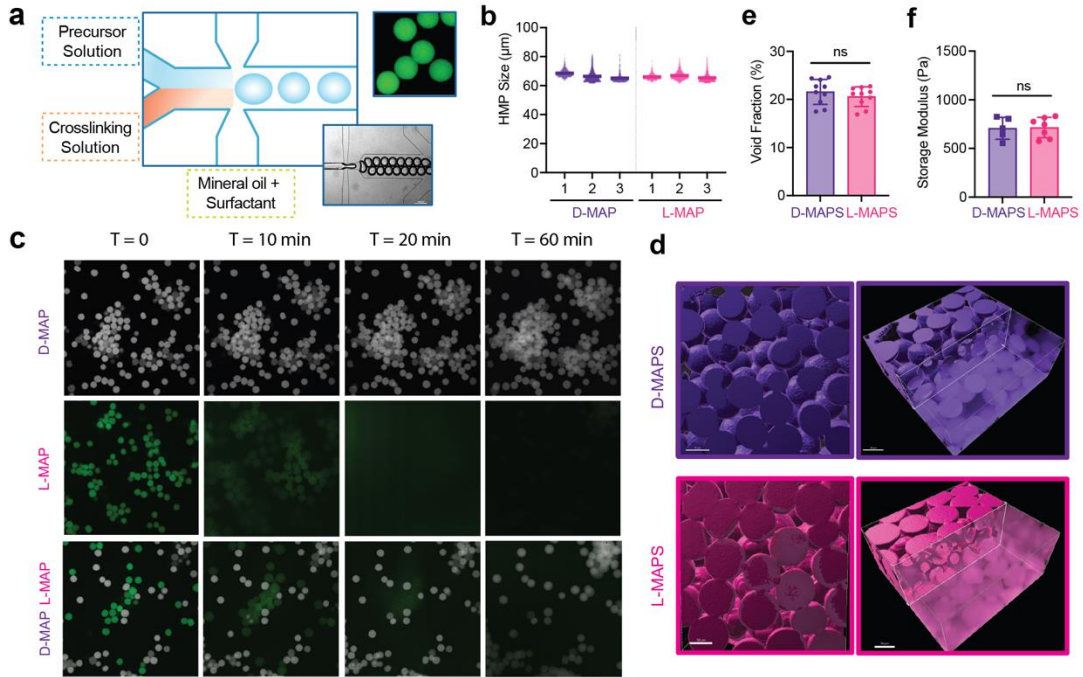

**Supplementary Figure 1:** L- and D-chiral peptide crosslinked microporous annealed particle scaffolds (MAPS) have similar mechanical properties. a, Scheme illustrating microgel formation using a microfluidic water-in-oil emulsion system. A precursor solution and a crosslinker solution were fused and segmented into droplets, which were then crosslinked into microgels via Michael addition. b, Microgels were monodisperse and around 70  $\mu\text{m}$  in size. c, L-MAPS degraded within 20 minutes when incubated in collagenase IV solution at 37°C while D-MAPS took more than 1 hour to degrade. d, IMARIS software-rendered fluorescent images showing D-MAPS (top) and L-MAPS (bottom) with similar microstructures. e-f, both MAPS have comparable void fraction and storage modulus. Data are means  $\pm$  SEM,  $n = 6$ , statistical significances were calculated using Student's t-test between L- and D-MAPS groups. Error bars, mean  $\pm$  s.e.m.  $n = 10$  scaffolds per group in e,  $n = 5$  for D-MAPS and  $n = 7$  for L-MAPS in f.

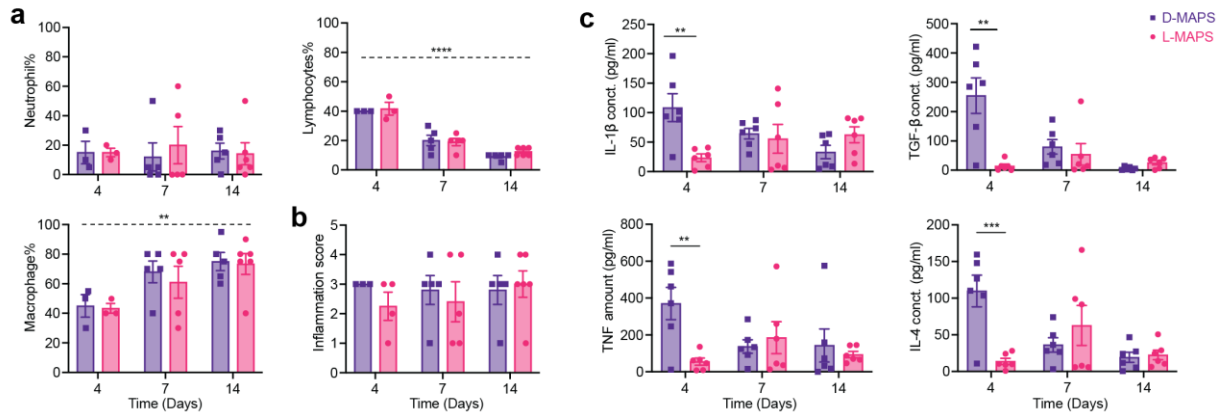

**Supplementary Figure 2:** D-MAPS elicited an early immune response on day 4. a, percentages of neutrophils, macrophages and lymphocytes among the total infiltrated cells inside the implants as a subjective quantification by a dermatopathologist based on H&E stained paraffin sections. The dotted line indicated a significant time-dependent difference in both scaffolds. b, histologic assessment of inflammation level in L- and D-MAPS based on a modified 5-point scoring system established and agreed upon by two dermatopathologists. c, ELISA results of cytokine level inside the hydrogel implants from a repeated subcutaneous implantation study. Statistical analysis: two-way ANOVA with Šídák's multiple comparisons test made between L- and D-MAPS groups only when there was a significance in the interaction term of scaffold type x time. \*  $p < 0.05$ , \*\*  $p < 0.01$ , \*\*\*  $p < 0.001$ , \*\*\*\*  $p < 0.0001$ . Error bars, mean  $\pm$  s.e.m.  $n = 6$  mice per group for all assays with some data points removed due to experimental reasons.

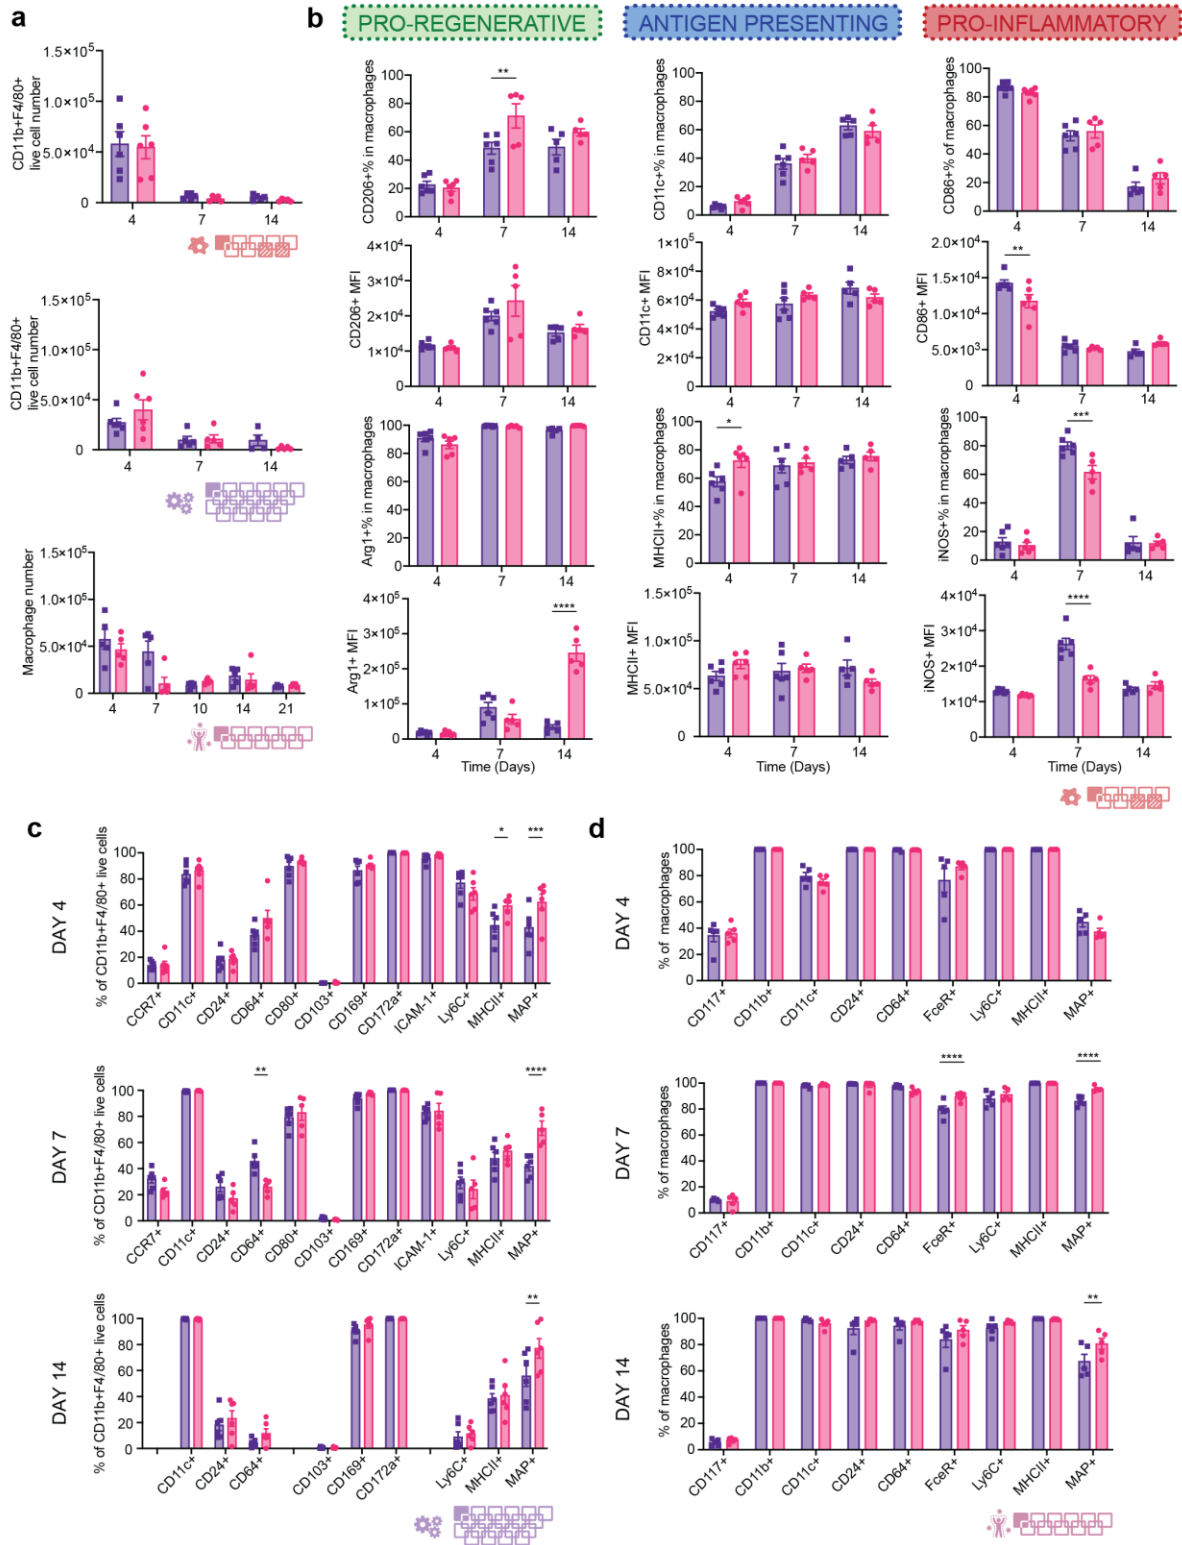

**Supplementary Figure 3: Macrophage phenotypes characterized by different gating strategies (traditional gating versus algorithm-aided gating) and by different flow cytometry panels. a,** CD11b+F4/80+ cell number or pre-gated macrophage number over time. The red, purple, pink

symbols beneath the graphs stand for the 9-color macrophage panel, the 20-color APC panel, the 11-color innate panel used to acquire the data. b, traditional gating of the data set presented in Figure 3, showing the positive expression percentage and MFI of Arg1, CD206, CD11c, MHCII, CD86 and iNOS in CD11b+F4/80+ macrophage population over time. c, the marker expression profile in CD11b+F4/80+ macrophage population over time. d, the marker expression profile in pre-gated macrophage population (following the corresponding gating strategy) over time. Statistical analysis: two-way ANOVA with Šídák's multiple comparisons test made between L- and D-MAPS groups only when there was a significance in the interaction term of scaffold type x time. \*  $p < 0.05$ , \*\*  $p < 0.01$ , \*\*\*  $p < 0.001$ , \*\*\*\*  $p < 0.0001$ . Error bars, mean  $\pm$  s.e.m.  $n = 6$  mice per group for all assays with some data points removed due to experimental reasons.

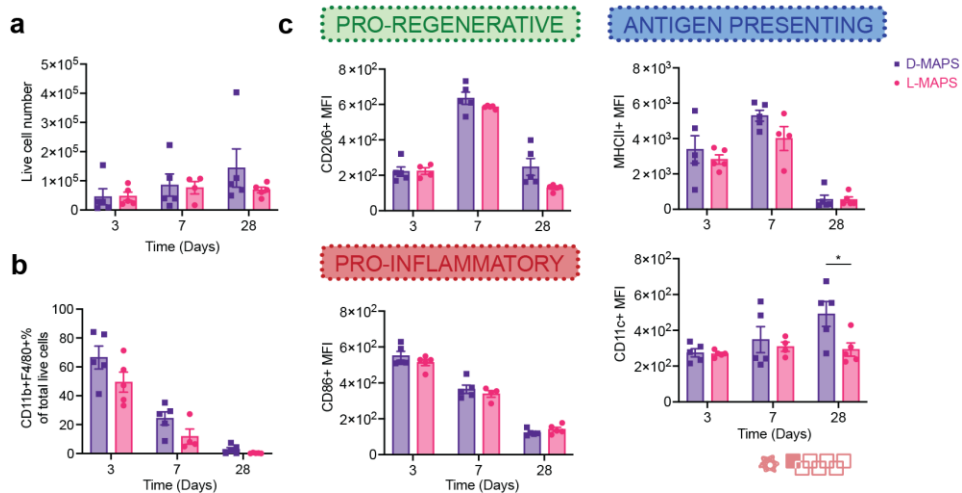

**Supplementary Figure 4:** Macrophage phenotypes characterized by a 7-color panel showed a similar trend of phenotype shift over time. a, total live cell number over time. b, percentage of CD11b+F4/80+ cells in total live cells over time. c, traditional gating of the data set, showing the MFI of CD206, CD11c, MHCII, CD86 in CD11b+F4/80+ macrophage population over time. Statistical analysis: two-way ANOVA with Šídák's multiple comparisons test made between L- and D-MAPS groups only when there was a significance in the interaction term of scaffold type x time. \*  $p < 0.05$ . Error bars, mean  $\pm$  s.e.m.  $n = 5$  mice per group. The red symbol beneath the graph stands for the 7-color macrophage panel used to acquire the data.

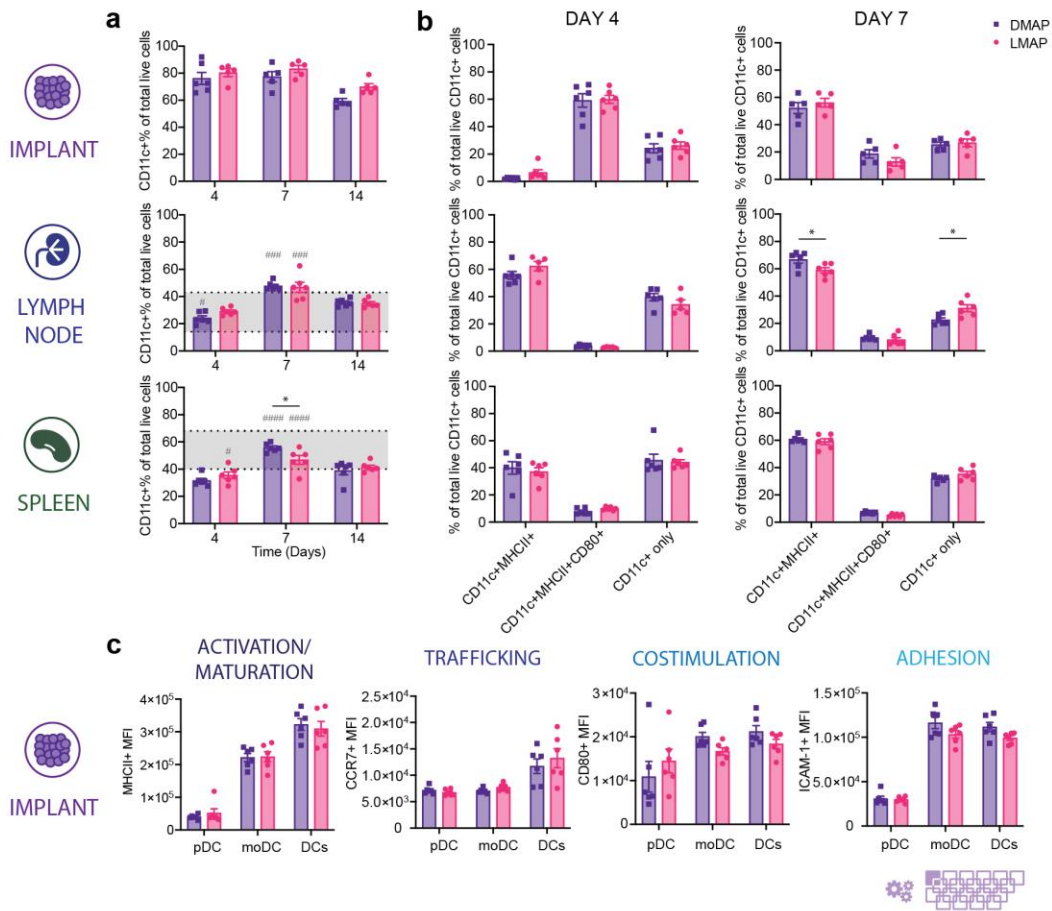

**Supplementary Figure 5:** MAP+CD11c+ cells migrated from the implant sites to draining lymph nodes and the spleen and showed mature antigen-presenting phenotype. a, the percentage of CD11c+ cells among the total live cells infiltrating the implants, residing in dLN or spleen. The gray shade stands for the baseline level of CD11c+-% in dLN and the spleen in health naïve mice. b, the percentages of CD11c+MHCII+, CD11c+MHCII+CD80+ (activated mature APCs) and CD11c+ cells among CD11c+ live cells on day 4 and day 7. c, MFI of MHCII, CCR7, CD80 and ICAM-1 in pDC, moDC and cDC on day 4. Statistical analysis: two-way ANOVA with Šídák's multiple comparisons test made between L- and D-MAPS groups only when there was a significance in the interaction term of scaffold type x time. After a two-way ANOVA, Dunnet method was used to compare the experiment groups with the baseline control group. \*  $p < 0.05$ , \*\*/###  $p < 0.01$ , \*\*\*/####  $p < 0.001$ , \*\*\*\*\*/#####  $p < 0.0001$ . Asterisks stand for comparisons between L- and D-MAPS. Pound signs stand for comparisons between L- or D-MAPS and the baseline control (mice without implant). Error bars, mean  $\pm$  s.e.m.  $n = 6$  mice per group. The purple symbol in the bottom left corner of the graph stands for the 20-color APC panel used in this figure.

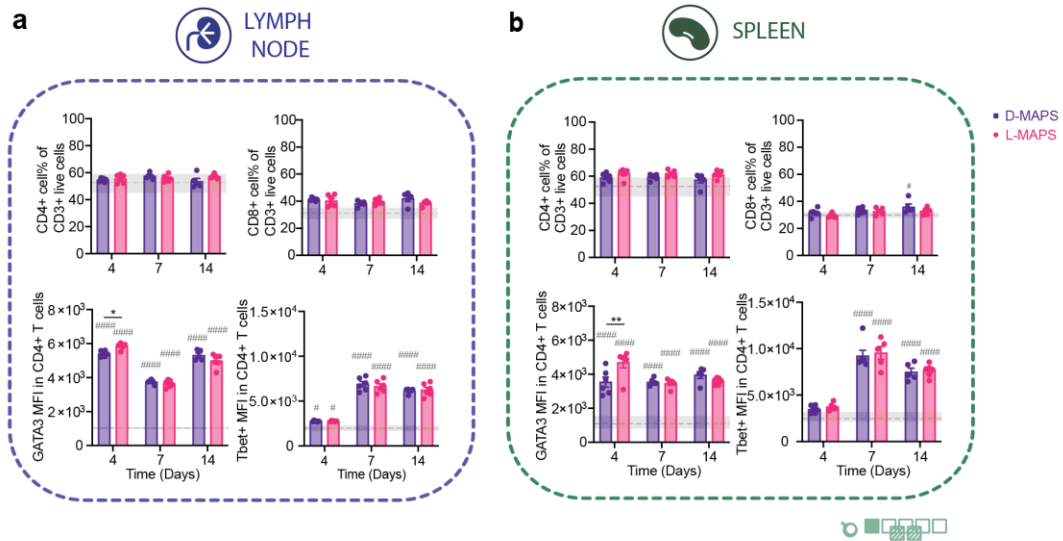

**Supplementary Figure 6:** MAPS induced a phenotype switch in T cell population compared to baseline in draining lymph nodes and spleen of mice with D or L-MAPS across 3 time points. Each column shows the percentage of specific cell subpopulations. Data are means  $\pm$  SEM,  $n = 6$ , and statistical significances were calculated using two-way ANOVA with the Sidak method to compare D vs. L-MAPS (black asterisk) and the Dunnet method to compare each treatment against the baseline control group without material implantation (gray asterisk). \*/#  $p < 0.05$ , \*\*  $p < 0.01$ , ####  $p < 0.0001$ . The green symbol in the bottom right corner stands for the 7-color T cell panel used in this figure.

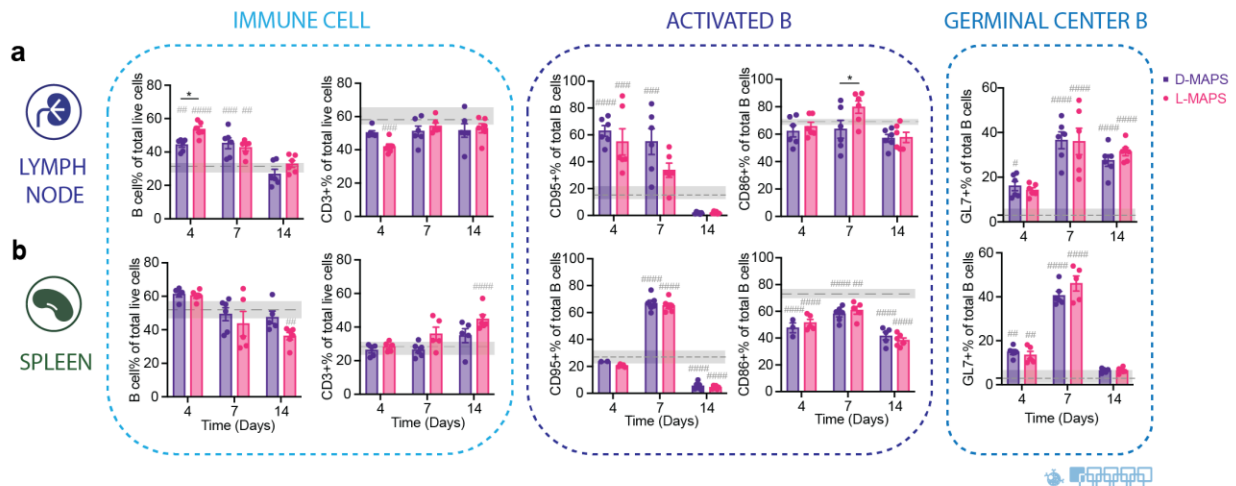

**Supplementary Figure 7:** MAPS induced a phenotype switch in B cell population compared to baseline in draining lymph nodes and spleen of mice with D or L-MAPS implants across 3 time points. Each column shows the percentage of specific cell subpopulations. Data are means  $\pm$  SEM,  $n = 6$ , and statistical significances were calculated using two-way ANOVA with the Sidak method to compare D vs. L-MAPS (black asterisk) and the Dunnet method to compare each treatment against the baseline control group without material implantation (gray number sign). \*/#  $p < 0.05$ , \*\*/##  $p < 0.01$ , \*\*\*/####  $p < 0.01$ , \*\*\*\*/#####  $p < 0.0001$ . The blue symbol in the bottom right corner stands for the 9-color B cell panel used in this figure.

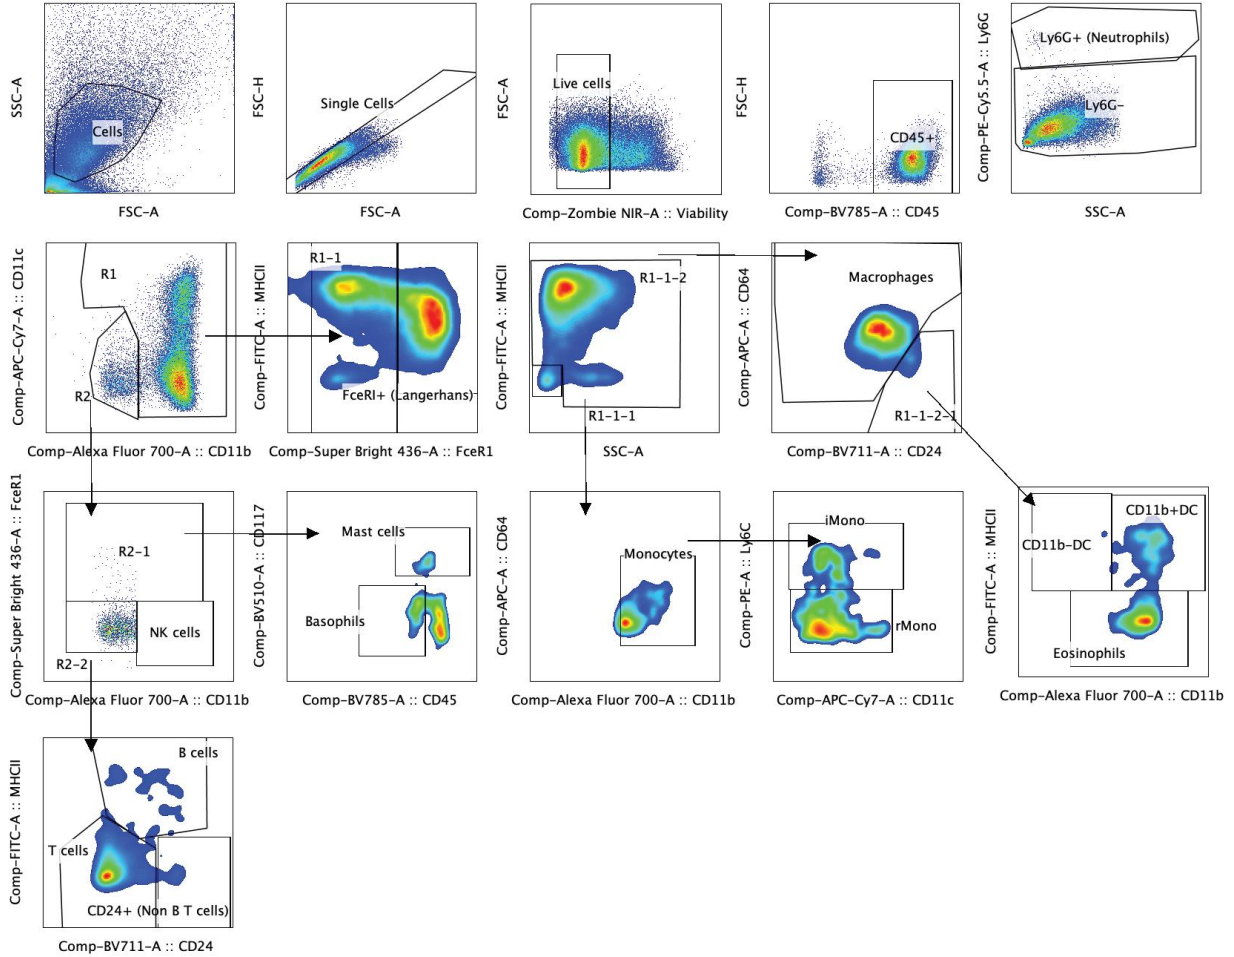

**Supplementary Figure 8:** Gating strategy for flow cytometry analysis on myeloid cells with 11 markers, using one representative MAPS sample as an example. Adapted panel from Yu, et al.<sup>1</sup>

**a**  
MACROPHAGE  
PANEL

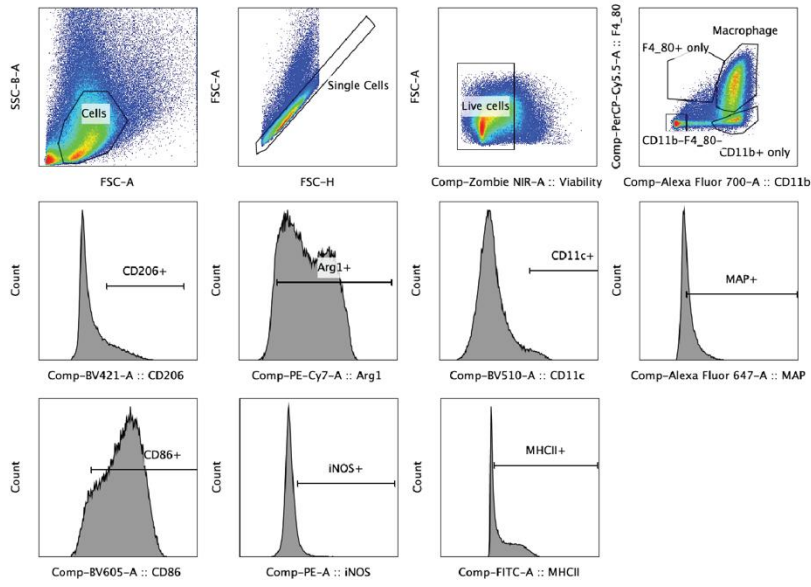

**b**  
B CELL PANEL

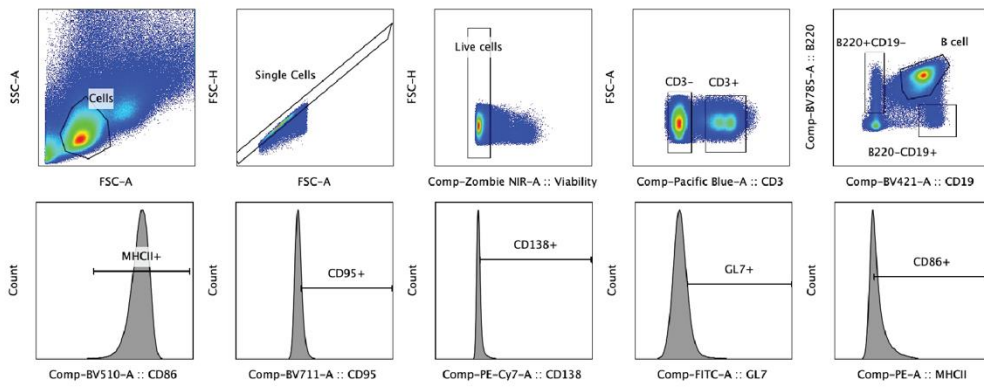

**c**  
T CELL PANEL

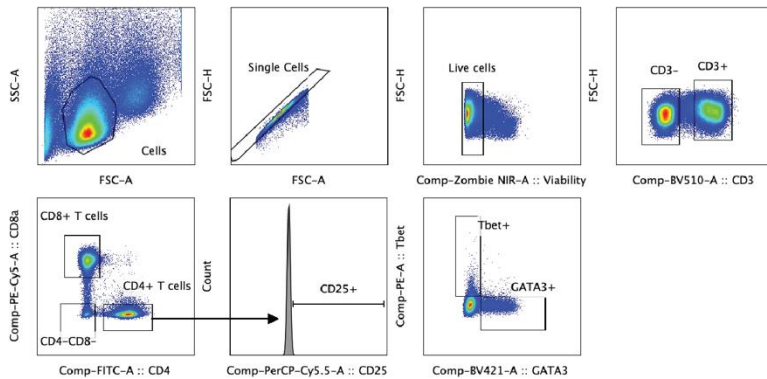



**Supplementary Figure 9:** Gating strategy for flow cytometry analysis on: a) macrophages with 9 markers, using one representative MAPS sample as an example. b) B cells with 9 markers, using one representative splenocyte sample as an example. c) T cells with 7 markers, using one representative splenocyte sample as an example.

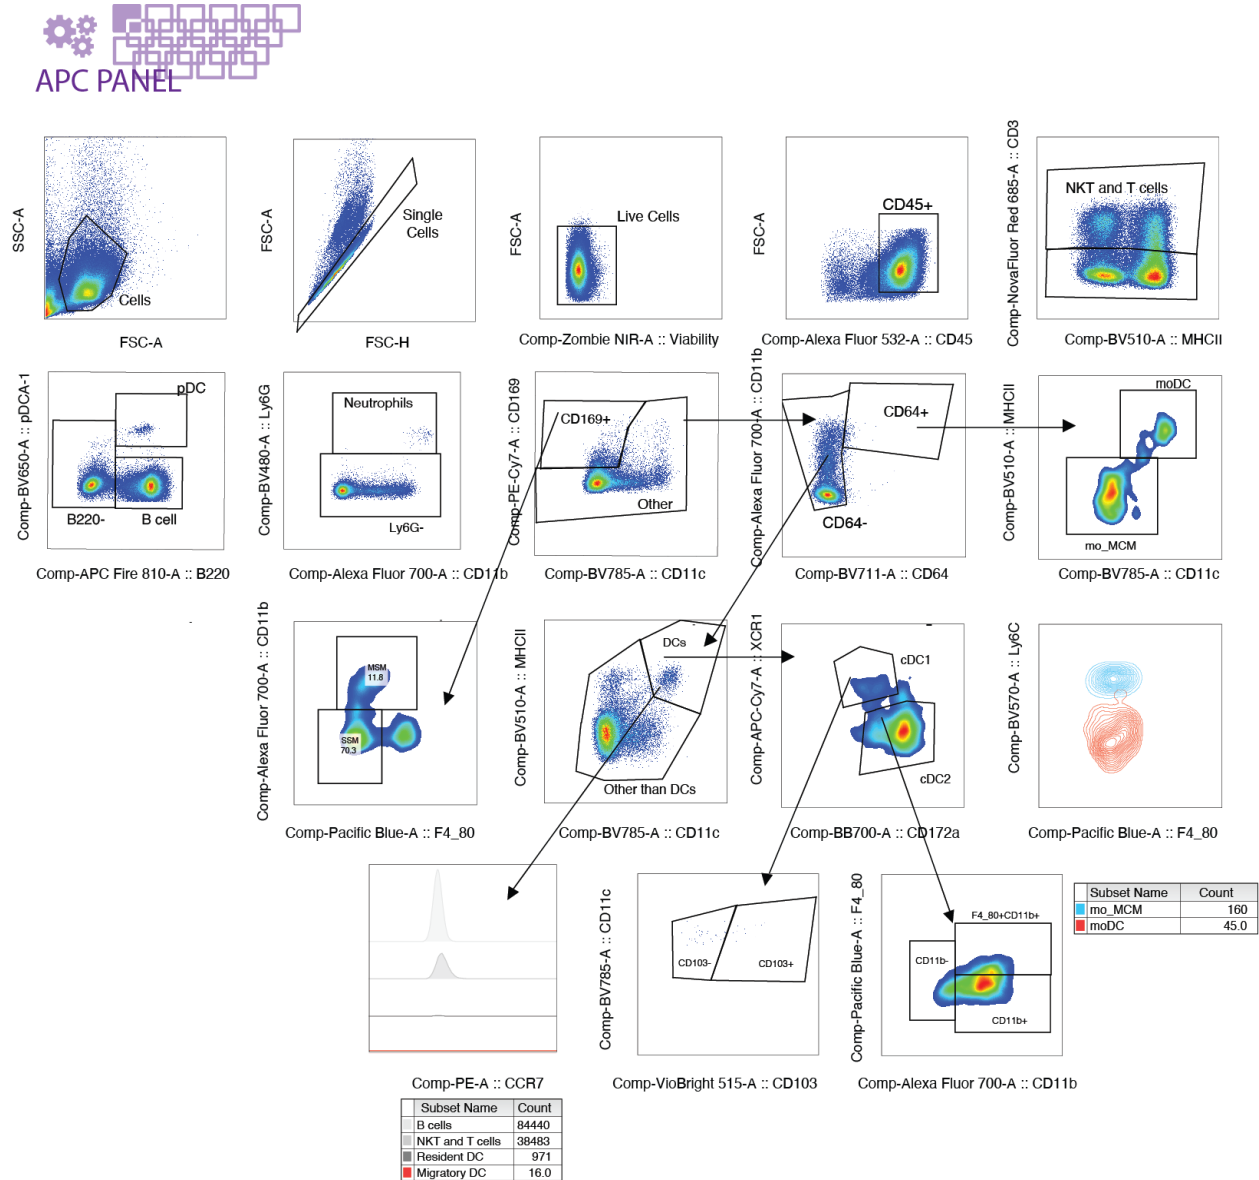

**Supplementary Figure 10:** Gating strategy for flow cytometry analysis on APCs with 20 markers, using one representative spleen as an example. OMIP-061 adapted from DiPiazza, et al.<sup>2</sup>

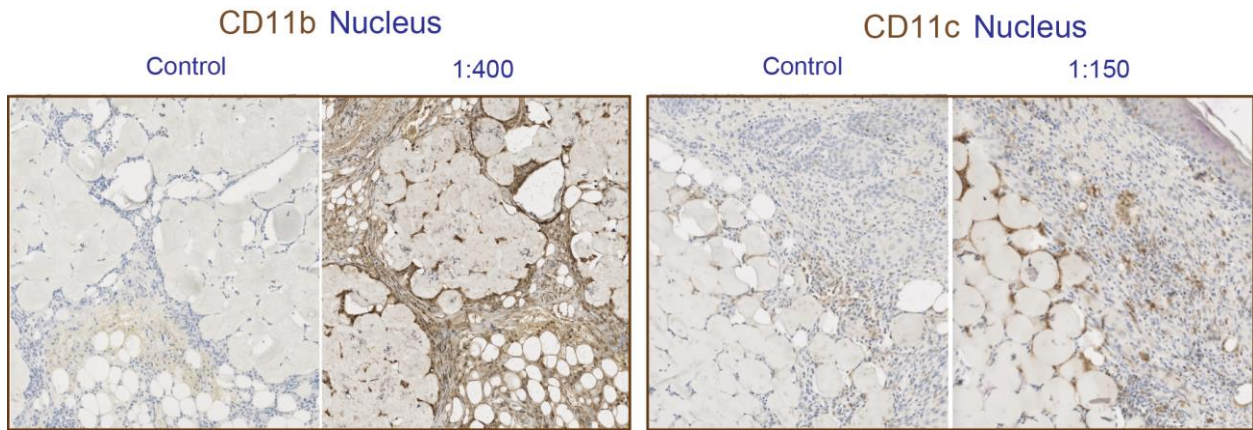

**Supplementary Figure 11:** primary delete control for CD11b and CD11c IHC stains.

**Supplementary Table 1. Scoring of Granulation Tissue/Vascularization**

| Score | Criteria                                                      |
|-------|---------------------------------------------------------------|
| 0     | No granulation tissue.                                        |
| 1     | Early granulation tissue, no vascularization.                 |
| 2     | Mature granulation tissue, early vascularization.             |
| 3     | Mature granulation tissue with mature blood vessel formation. |

**Supplementary Table 2. Scoring of Collagen Deposition/Fibroplasia**

| Score | Criteria                                                                                                     |
|-------|--------------------------------------------------------------------------------------------------------------|
| 0     | No collagen deposition/fibroplasia.                                                                          |
| 1     | Fibroblast proliferation/no collagen deposition.                                                             |
| 2     | Fibroblast proliferation with minimal collagen deposition.                                                   |
| 3     | Fibroblast proliferation with extensive haphazard collagen deposition.                                       |
| 4     | Extensive organized collagen deposition or complete replacement of dermis with fibrous tissue (mature scar). |

**Supplementary Table 3. Scoring of Inflammation**

| Score | Criteria                                                                      |
|-------|-------------------------------------------------------------------------------|
| 0     | No inflammatory cells.                                                        |
| 1     | 1-50 leukocytes per high power field.                                         |
| 2     | 51-100 leukocytes per high power field.                                       |
| 3     | 101-250 leukocytes per high power field.                                      |
| 4     | >250 leukocytes per high power field or micro-abscesses or abscesses present. |

**Supplementary Table 4.** A list of antibodies for the innate panel

| Marker | Clone       | Fluorophore     | Supplier       | Cat. #     | Titration (tissue/cell type) |
|--------|-------------|-----------------|----------------|------------|------------------------------|
| FCeR1  | MAR-1       | PB              | BioLegend      | 134314     | 2 in 100 (Splenocyte)        |
| CD117  | ACK2        | PE              | BioLegend      | 135105     | 1.25 in 100 (Splenocyte)     |
| CD45   | 30-F11      | BV785           | BioLegend      | 103149     | 0.625 in 100 (Implant)       |
| CD24   | M1/69       | BV711           | BD Biosciences | 563450     | 0.25 in 100 (Implant)        |
| Ly6C   | HK1.4       | BV510           | BioLegend      | 128033     | 1.25 in 100 (Splenocyte)     |
| MHCII  | M5/114.15.2 | SB600           | eBioscience    | 63-5321-82 | 0.5 in 100 (Splenocyte)      |
| Ly6G   | 1A8         | PE-Cy5          | eBioscience    | 15-9668-82 | 0.3125 in 100 (Implant)      |
| CD64   | X54-5/7.1   | PE-Cy7          | BioLegend      | 139313     | 0.625 in 100 (Implant)       |
| CD11b  | M1/70       | Alexa Fluor 700 | eBioscience    | 56-0112-80 | 0.0625 in 100 (Implant)      |
| CD11c  | N418        | APC-Cy7         | BioLegend      | 117323     | 0.039 in 100 (Implant)       |
|        |             | Zombie NIR      | BioLegend      | 423105     | 0.0625 in 100 (Splenocyte)   |

**Supplementary Table 5.** A list of antibodies for the macrophage panel

| Marker    | Clone       | Fluorophore     | Supplier    | Cat. #     | Titration (cell type)      |
|-----------|-------------|-----------------|-------------|------------|----------------------------|
| CD206     | C068C2      | BV421           | BioLegend   | 141717     | 2 in 100 (Macrophage)      |
| CD11c     | N418        | BV510           | BioLegend   | 117338     | 1.25 in 100 (Macrophage)   |
| MHCII     | M5/114.15.2 | FITC            | eBioscience | 11-5321-82 | 0.25 in 100 (Macrophage)   |
| iNOS      | CXNFT       | PE              | eBioscience | 12-5920-80 | 1.5 in 100 (Macrophage)    |
| F4/80     | BM8         | PerCP-Cy5.5     | eBioscience | 45-4801-80 | 0.5 in 100 (Macrophage)    |
| CD86      | GL-1        | BV605           | BioLegend   | 105037     | 0.156 in 100 (Macrophage)  |
| Arg1      | A1exF5      | PE-CY7          | eBioscience | 17-3697-80 | 1.5 in 100 (Macrophage)    |
| CD11b     | M1/70       | Alexa Fluor 700 | eBioscience | 56-0112-80 | 0.25 in 100 (Macrophage)   |
| Viability |             | Zombie NIR      | BioLegend   | 423105     | 0.0625 in 100 (Macrophage) |

**Supplementary Table 6.** A list of antibodies for the B cell panel

| Marker | Clone     | Fluorophore | Supplier       | Cat. # | Titration (cell type)      |
|--------|-----------|-------------|----------------|--------|----------------------------|
| CD3    | 17A2      | PB          | BioLegend      | 100214 | 0.25 in 100 (Splenocyte)   |
| GL7    | GL7 (RUO) | FITC        | BD Pharmingen  | 553666 | 1 in 100 (Splenocyte)      |
| CD95   | Jo2 (RUO) | BV711       | BD Biosciences | 740716 | 1 in 100 (Splenocyte)      |
| B220   | RA3-6B2   | BV785       | BioLegend      | 103226 | 0.0625 in 100 (Splenocyte) |
| CD19   | 1D3       | BV421       | BioLegend      | 115537 | 0.3125 in 100 (Splenocyte) |

|           |             |            |           |        |                            |
|-----------|-------------|------------|-----------|--------|----------------------------|
| MHCII     | M5/114.15.2 | BV510      | BioLegend | 107608 | 0.125 in 100 (Splenocyte)  |
| CD138     | 281-2       | PE-Cy7     | BioLegend | 142513 | 1 in 100 (Splenocyte)      |
| CD86      | GL-1        | PE         | BioLegend | 105040 | 0.625 in 100 (Macrophage)  |
| Viability |             | Zombie NIR | BioLegend | 423105 | 0.0625 in 100 (Splenocyte) |

**Supplementary Table 7.** A list of antibodies for the T cell panel

| Marker    | Clone    | Fluorophore | Supplier      | Cat. # | Titration (cell type)      |
|-----------|----------|-------------|---------------|--------|----------------------------|
| CD3       | 17A2     | BV510       | BioLegend     | 100233 | 1.25 in 100 (Splenocyte)   |
| CD4       | GK1.5    | FITC        | BD Pharmingen | 557307 | 0.156 in 100 (Splenocyte)  |
| CD8a      | 53-6-7   | PE-Cy5.5    | BioLegend     | 100710 | 0.1 in 100 (Splenocyte)    |
| CD25      | PC61     | PerCP-Cy5.5 | BioLegend     | 102030 | 0.5 in 100 (Splenocyte)    |
| Tbet      | 4B10     | PE          | BioLegend     | 644810 | 2.5 in 100 (Splenocyte)    |
| GATA3     | 16E10A23 | BV421       | BioLegend     | 653806 | 2.5 in 100 (Splenocyte)    |
| Viability |          | Zombie NIR  | BioLegend     | 423105 | 0.0625 in 100 (Splenocyte) |

**Supplementary Table 8.** A list of antibodies for the APC panel

| Marker    | Clone     | Fluorophore       | Supplier      | Cat. #      | Titration (cell type)       |
|-----------|-----------|-------------------|---------------|-------------|-----------------------------|
| CD3       | 17A2      | NovaFluor Red 685 | Thermo Fisher | M002T02R02  | 0.0625 in 100 (Splenocyte)  |
| CD45      | 30-F11    | Alexa Fluor 532   | Thermo Fisher | 58-0451-82  | 0.3125 in 100 (Splenocyte)  |
| XCR1      | ZET       | APC-Cy7           | BioLegend     | 148223      | 0.3125 in 100 (Splenocyte)  |
| CD64      | X54-5/7.1 | BV711             | BioLegend     | 139311      | 0.156 in 100 (Splenocyte)   |
| Ly6C      | HK1.4     | BV570             | BioLegend     | 128030      | 0.625 in 100 (Splenocyte)   |
| CD169     | 3D6.112   | PE-Cy7            | BioLegend     | 142412      | 2.5 in 100 (Splenocyte)     |
| F4/80     | BM8       | PB                | Thermo Fisher | MF48028     | 2 in 100 (Splenocyte)       |
| CD80      | 16-10A1   | PE-CF594          | BioLegend     | 104737      | 1.25 in 100 (Splenocyte)    |
| CD103     | M290      | VioBright515      | Miltenyi      | 130-111-609 | 2 in 100 (Splenocyte)       |
| CD24      | M1/69     | SB600             | Thermo Fisher | 63-0242-80  | 0.625 in 100 (Splenocyte)   |
| CD11c     | N418      | SB780             | Thermo Fisher | 78-0114-82  | 0.625 in 100 (Splenocyte)   |
| pDCA-1    | 927       | BV650             | BioLegend     | 127019      | 0.078 in 100 (Splenocyte)   |
| ICAM-1    | 3E2       | SB436             | Thermo Fisher | 62-0542-80  | 0.625 in 100 (Splenocyte)   |
| CCR7      | 4B12      | PE                | Thermo Fisher | 12-1971-80  | 1.25 in 100 (Splenocyte)    |
| B220      | RA3-6B2   | APC/Fire810       | BioLegend     | 103277      | 0.3125 in 100 (Splenocyte)  |
| CD172a    | P84       | BB700             | BD Bioscience | 742205      | 1 in 100 (Splenocyte)       |
| MHCII     | M5/114    | BV510             | BioLegend     | 107635      | 0.25 in 100 (Splenocyte)    |
| Ly6G      | 1A8       | BV480             | BD Bioscience | 746448      | 0.125 in 100 (Splenocyte)   |
| CD11b     | M1/70     | Alexa Fluor 700   | eBioscience   | 56-0112-80  | 0.0625 in 100 (Splenocyte)  |
| Viability |           | Zombie NIR        | BioLegend     | 423105      | 0.03125 in 100 (Splenocyte) |

**Supplementary Table 9** fluorescence minus one (FMO) controls macrophage panel

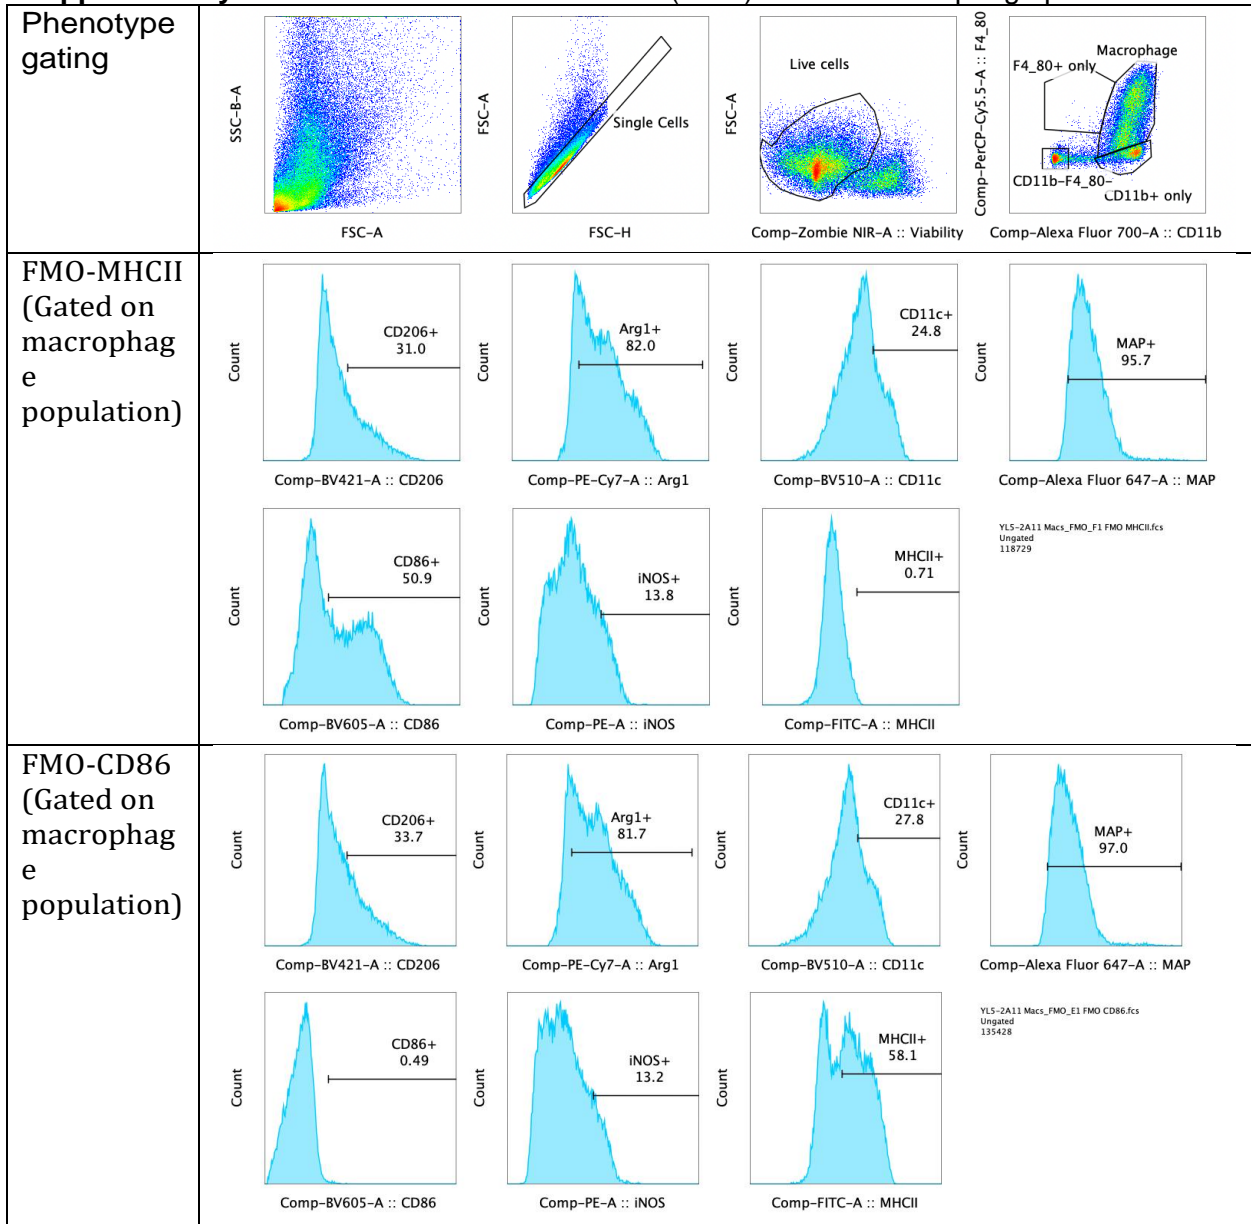

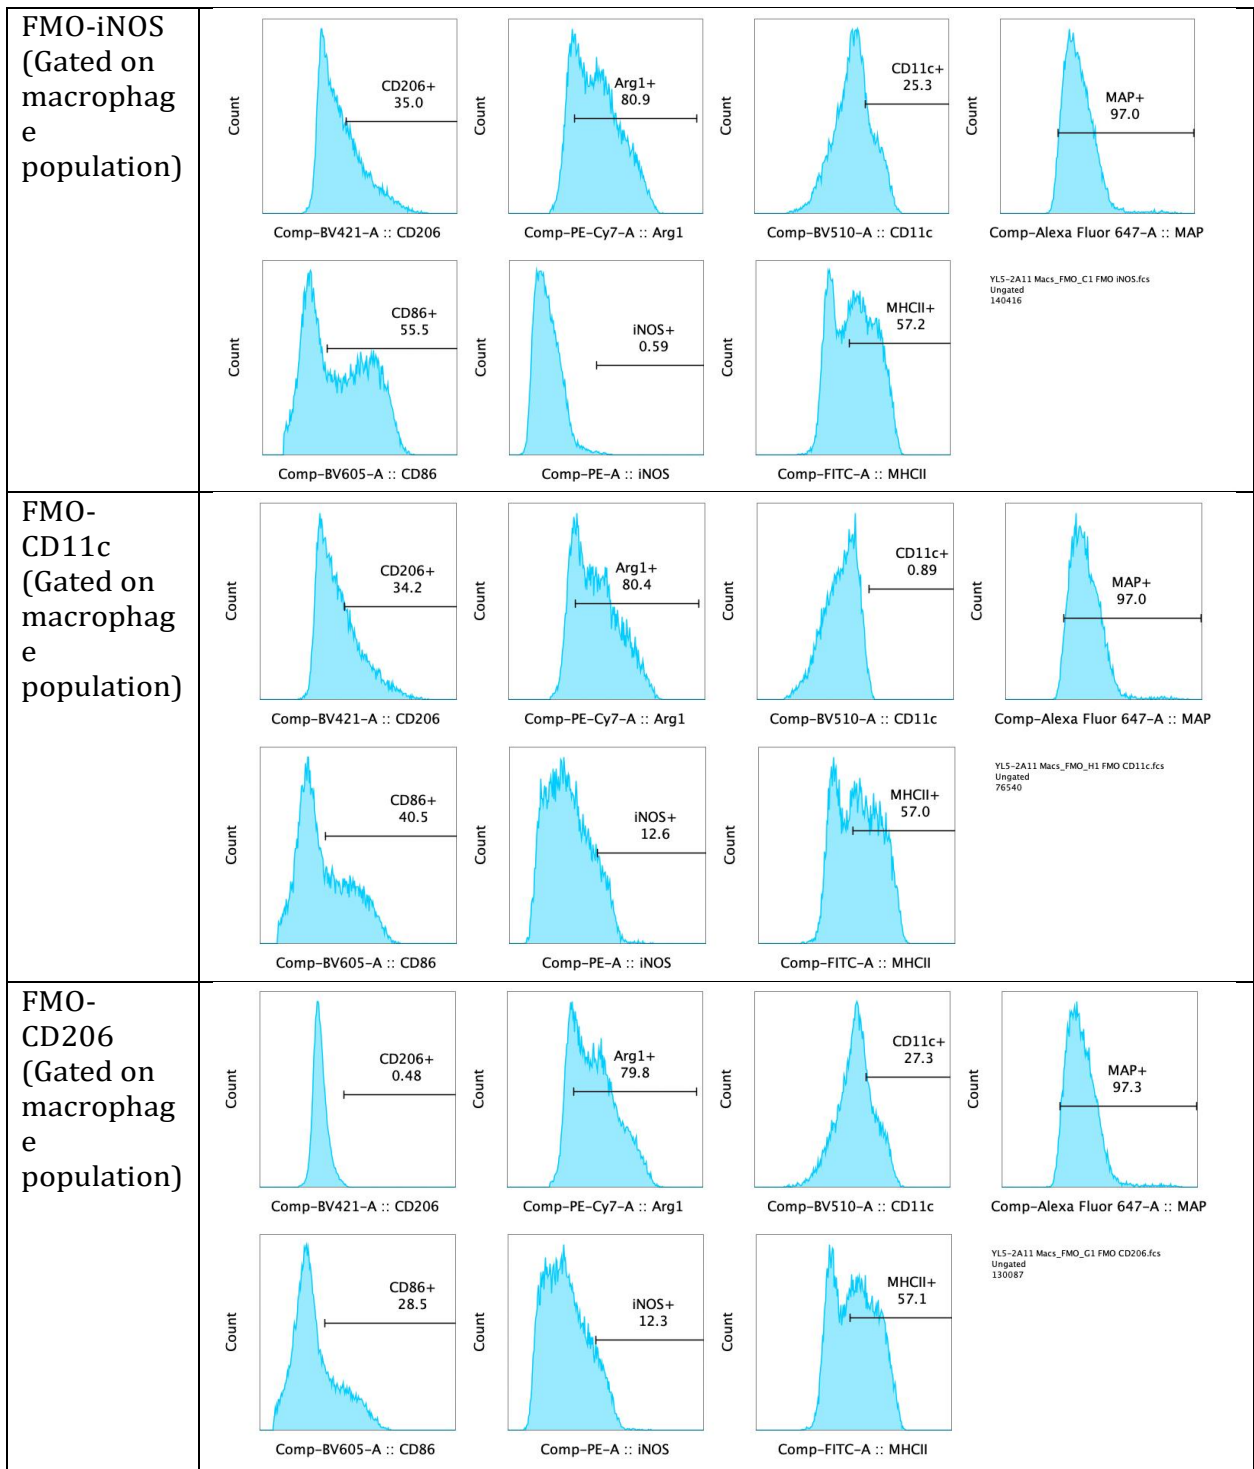

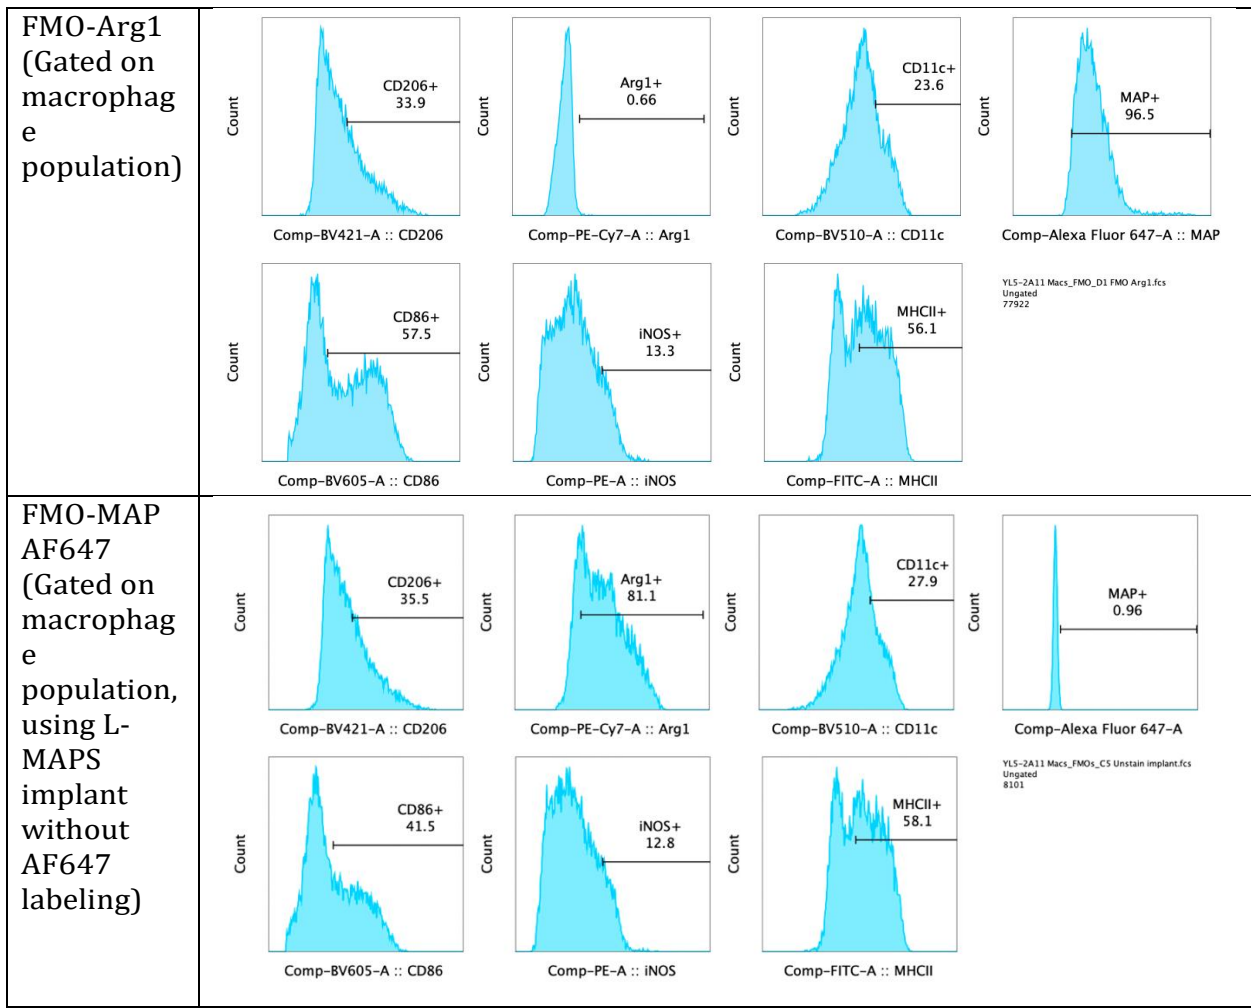

Supplementary Table 10 fluorescence minus one (FMO) controls B cell panel

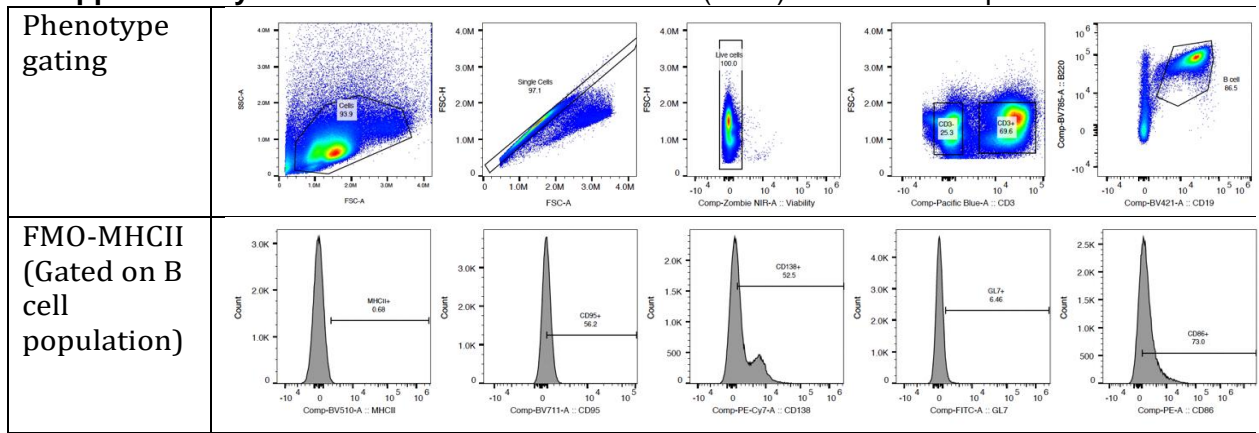

**FMO-Tbet**

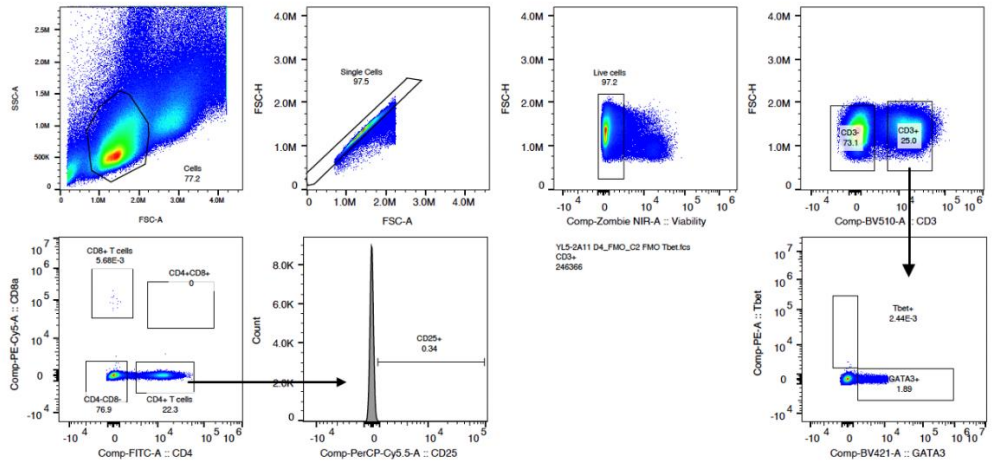

**FMO-CD95  
(Gated on B cell population)**

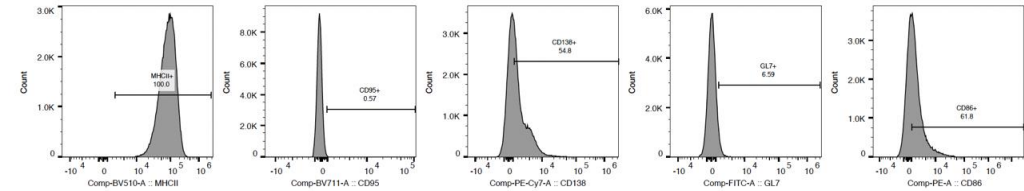

**FMO-CD138  
(Gated on B cell population)**

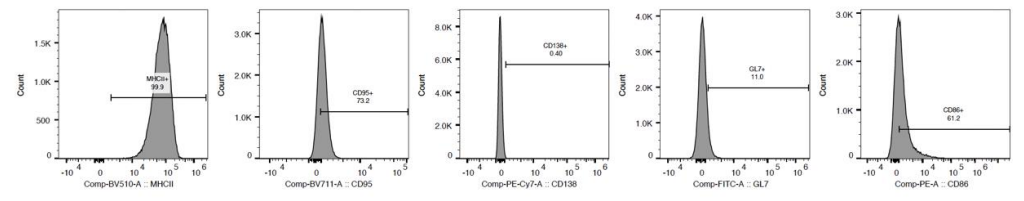

**FMO-GL7  
(Gated on B cell population)**

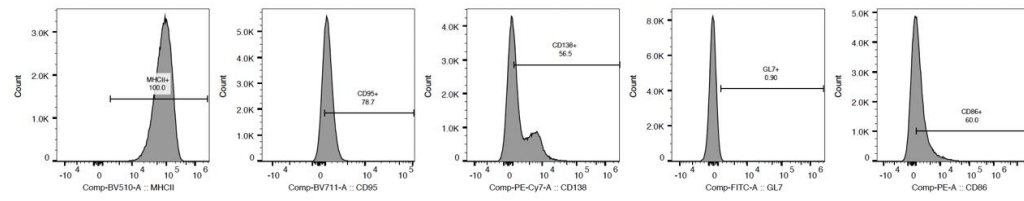

**FMO-CD86  
(Gated on B cell population)**

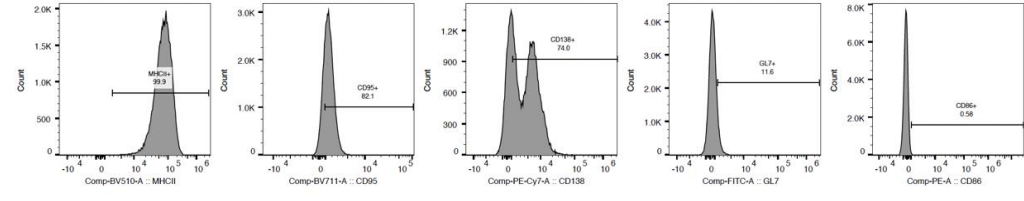



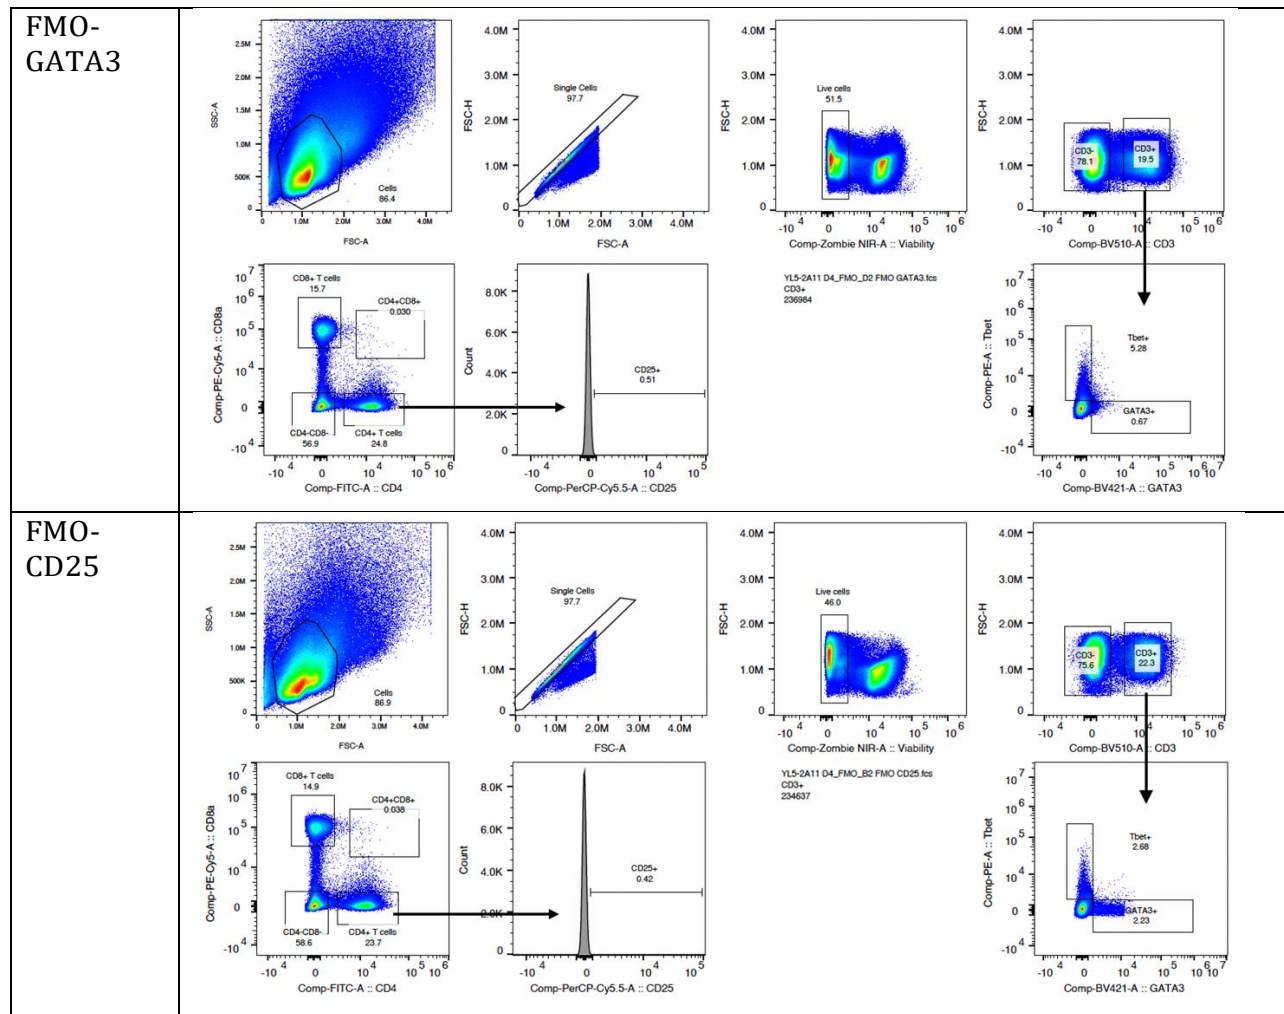

**Supplementary Table 11.** fluorescence minus one (FMO) controls T cell panel

## References

- 1 Yu, Y.-R. A. *et al.* A protocol for the comprehensive flow cytometric analysis of immune cells in normal and inflamed murine non-lymphoid tissues. *PLoS one* **11**, e0150606 (2016).
- 2 DiPiazza, A. T., Hill, J. P., Graham, B. S. & Ruckwardt, T. J. OMIP-061: 20-color flow cytometry panel for high-dimensional characterization of murine antigen-presenting cells. *Cytometry Part A* **95**, 1226-1230 (2019).
